# Supplementary material for: Baicalin inhibits APEC-induced lung injury by regulating gut microbiota and SCFA production
Source: Royal Society of Chemistry journal article supplement (doi:10.1039/d1fo02407h), 2021-01-01
Supplement: d1fo02407h1.pdf [file d1fo02407h1.pdf]

## **Table legends**

**Table S1. The relative abundance of the top 10 phyla in gut microbiota among CON, BAI, APEC and BAI+APEC groups.**

**Table S2. The relative abundance of the top 20 genera in gut microbiota among CON, BAI, APEC and BAI+APEC groups.**

**Table S3. The relative abundance of the top 10 phyla in the lung microbiota between CON and BAI groups.**

**Table S4. The relative abundance of the top 10 genera in the lung microbiota between CON and BAI groups.**
