# Supplementary material for: Baicalin inhibits APEC-induced lung injury by regulating gut microbiota and SCFA production
Source: Royal Society of Chemistry journal article supplement (doi:10.1039/d1fo02407h), 2021-01-01
Supplement: d1fo02407h2.xlsx [file d1fo02407h2.xlsx]

## Sheet: Table S1
Table S1. The relative abundance of the top 10 phyla in gut microbiota among CON, BAI, APEC and BAI+APEC groups.
Phylum	CON	BAI	APEC	BAI+APEC
Firmicutes	92.0398	87.1577	96.0139	95.7183
Proteobacteria	5.75327	11.3618	0.6154	1.20136
Tenericutes	1.45531	1.15473	2.34584	2.63372
Actinobacteria	0.54628	0.20402	0.79415	0.2062
unclassified	0.16802	0.10698	0.20432	0.19576
Bacteroidetes	0.02736	0.0122	0.01672	0.03232
Acidobacteria	0.00658	0.00121	0.00728	0.00431
Cyanobacteria	0.00335	0.00144	0.00175	0.008
Elusimicrobia	0	0	0.00061	0

## Sheet: Table S2
Table S2. The relative abundance of the top 20 genera in gut microbiota among CON, BAI, APEC and BAI+APEC groups.
Genus	CON	BAI	APEC	BAI+APEC
Lachnospiraceae_unclassified	17.0693	17.6652	12.1117	13.9148
Ruminococcaceae_UCG-014	6.39355	4.35479	10.6375	8.40757
Ruminococcaceae_unclassified	3.83512	6.08867	7.59104	3.13351
Intestinimonas	2.99317	7.6495	3.5855	5.47327
Escherichia-Shigella	5.71741	11.3171	0.56626	1.1492
Erysipelatoclostridium	4.48397	4.74941	3.84904	3.09227
Ruminococcus]_torques_group	2.96511	4.98353	3.5734	4.81569
Clostridiales_vadinBB60_group_unclassified	3.07162	1.82028	6.07559	5.56123
Blautia	3.55997	3.07509	1.81666	2.89643
Fournierella	3.91356	2.10419	0.89024	4.29836
Ruminiclostridium_5	2.62017	1.65866	3.87779	3.08305
Ruminococcaceae_UCG-005	2.94924	1.49001	2.96844	2.99516
Ruminiclostridium_9	1.51521	1.99079	2.59074	2.42632
Subdoligranulum	2.93646	1.24918	2.65595	1.34314
Eubacterium]_coprostanoligenes_group	2.30015	1.31115	1.91765	2.7277
Pygmaiobacter	2.19531	3.4341	0.5876	0.75456
Negativibacillus	2.2532	1.40069	1.70622	1.8078
Firmicutes_unclassified	1.95423	1.44774	1.90142	1.87731
Christensenellaceae_R-7_group	1.3074	1.10749	1.74496	1.69296
Lactobacillus	1.87164	1.42307	1.11249	1.23044
GCA-900066575	1.29481	0.80063	2.3844	1.30778
Mollicutes_RF39_unclassified	1.02625	0.95919	1.42402	1.85991
Anaerotruncus	1.06068	1.29508	1.20696	1.43893
Clostridiales_unclassified	0.91626	1.50906	1.51109	1.04805
Bacillus	1.9224	0.98386	0.41157	1.16244
Anaerofilum	0.91377	0.96818	1.18448	1.31869
Oscillibacter	0.98736	0.68004	1.85419	0.76999
Clostridium	0.66042	1.32539	1.12235	1.04945
GCA-900066225	0.50379	0.54952	1.51272	1.67117
Butyricicoccus	1.26905	0.96243	0.55413	1.10271
Others	13.5394	9.64597	15.0739	14.5901

## Sheet: Table S3
Table S3. The relative abundance of the top 10 phyla in the lung microbiota between CON and BAI groups.
Taxonomy	Stenotrophomonas	Sphingomonas	Bradyrhizobium	Moraxella	Actinobacillus	Delftia	unidentified_Cyanobacteria	Streptococcus	Blautia	Faecalibacterium	Others
CONl	0.639542	0.0264497	0.0010123	0.0649951	0.046514	0.0703161	0.000882521	0.0131859	0.00181696	0.00249182	0.132793
CON2	0.284795	0.101905	0.212454	0.000674869	0.000415304	0.0173909	0.0178321	0.00116804	0.00134974	0.00259565	0.35942
CON3	0.798915	0.0245808	0.012537	0.00140165	0.000830608	0.0582204	0.00051913	0.000363391	0.005373	0.00389347	0.0933655
CON4	0.677802	0.0489799	0.0172351	0.00334839	0.00150548	0.0295644	0.0022063	0.00218035	0.00106422	0.00586617	0.210248
CON5	0.87219	0.0398432	0.00153143	0.00438665	0.00282926	0.0190002	0.000700825	0.00096039	0.00103826	0.000830608	0.056689
CON6	0.469553	0.0394279	0.0394279	0.0462545	0.00249182	0.0297461	0.00303691	0.0567669	0.00202461	0.00584021	0.30543
BAI1	0.552692	0.0306027	0.00783886	0.00256969	0.00158335	0.0493693	0.00181696	0.00184291	0.0344443	0.0321341	0.285106
BAI2	0.417874	0.0146395	0.00103826	0.0485386	0.0493173	0.0290453	0.00589212	0.0114987	0.00451643	0.00617765	0.411462
BAI3	0.228755	0.0131599	0.00386752	0.181202	0.169885	0.00454239	0.00353008	0.0410891	0.00815034	0.0075793	0.338239
BAI4	0.636505	0.0547942	0.00233608	0.000908477	0.000363391	0.126772	0.00259565	0.00290713	0.000934434	0.000415304	0.171469
BAI5	0.76717	0.025645	0.00467217	0.00103826	0.000311478	0.0153403	0.0044126	0.00155739	0.00508747	0.0039973	0.170768
BAI6	0.807948	0.037585	0.0145876	0.0138608	0.00301095	0.013731	0.00228417	0.00202461	0.00114209	0.00584021	0.0979858

## Sheet: Sheet4
Table S4. The relative abundance of the top 10 genera in lung microbiota among CON, APEC, BAI+APEC, and BAI groups
Taxonomy	Proteobacteria	Bacteroidetes	Firmicutes	Cyanobacteria	Actinobacteria	Tenericutes	unidentified_Bacteria	Acidobacteria	Chloroflexi	Fusobacteria	Others
CONl	0.879873	0.0147433	0.0743394	0.000882521	0.00599595	0.0116285	0.000155739	0.00246587	0.000778695	0.000545086	0.0085916
CON2	0.694907	0.118751	0.102866	0.0178321	0.0112651	0.00210248	0.0193635	0.00903286	0.00243991	0.00293308	0.018507
CON3	0.921637	0.0107979	0.0390126	0.00051913	0.00892904	0.000389347	0.000129782	0.00565852	0.00511343	0.000233608	0.0075793
CON4	0.82321	0.0679541	0.0755334	0.0022063	0.0136012	0.000571043	0.00521726	0.00324456	0.000856564	0.00212843	0.00547682
CON5	0.96187	0.00744952	0.0200903	0.000700825	0.00303691	0.000986347	0.000207652	0.0016093	0.000545086	0.000259565	0.00324456
CON6	0.65997	0.10733	0.155012	0.00316669	0.0317967	0.002985	0.0172611	0.00485386	0.00194674	0.00568447	0.00999325
BAI1	0.727171	0.0322639	0.181124	0.00181696	0.0341588	0.000389347	0.000311478	0.0105643	0.0056066	0.000259565	0.00633339
BAI2	0.635026	0.154208	0.154234	0.00589212	0.0109536	0.0113949	0.0111872	0.0050096	0.00259565	0.000311478	0.0091886
BAI3	0.654337	0.0430099	0.223875	0.00353008	0.0176245	0.0325494	0.00051913	0.00783886	0.00173909	0.00184291	0.013134
BAI4	0.920236	0.0120179	0.0525879	0.00259565	0.00158335	0.000103826	0.000752738	0.000596999	0.00051913	0.00044126	0.00856564
BAI5	0.848751	0.0401028	0.071588	0.0044126	0.0101749	0.000155739	0.00887712	0.00412708	0.00223226	0.002388	0.00718995
BAI6	0.920547	0.013134	0.0457613	0.00233608	0.0075793	0.000778695	0.000363391	0.00254374	0.000778695	0.000181695	0.00599595
